# Supplementary material for: Ein Vergleich traditioneller und computergestützter Methoden zur Erstellung einer deutschsprachigen Need for Cognition Kurzskala
Source: Atypon-hosted journal article supplement (doi:10.1026/0012-1924/a000242), 2019-12-19
Supplement: 0012-1924_a000242_esm1.pdf [file 0012-1924_a000242_esm1.pdf]

*Elektronisches Supplement 1. Ergänzende Kennwerte und Statistiken*

Anhang 1. Itemkennwerte und Faktorladungen der Items der 16-Item-Version aus Studie 1.

| Nr. | Item                                                                                                                                                                                 | Faktorladung | Schwierigkeit | Streuung | Trennschärfe | NFC-K-1 | NFC-K-2 | NFC-K-3 |
|-----|--------------------------------------------------------------------------------------------------------------------------------------------------------------------------------------|--------------|---------------|----------|--------------|---------|---------|---------|
| 1   | Die Aufgabe, neue Lösungen für Probleme zu finden, macht mir wirklich Spaß.                                                                                                          | 0.578        | 5.52          | 1.29     | 0.53         | x       |         |         |
| 2   | Ich würde lieber eine Aufgabe lösen, die Intelligenz erfordert, schwierig und bedeutend ist, als eine Aufgabe, die zwar irgendwie wichtig ist, aber nicht viel Nachdenken erfordert. | 0.607        | 4.62          | 1.71     | 0.55         |         |         |         |
| 3   | Ich setze mir eher solche Ziele, die nur mit erheblicher geistiger Anstrengung erreicht werden können.                                                                               | 0.590        | 4.12          | 1.50     | 0.54         | x       | x       | x       |
| 4   | Die Vorstellung, mich auf mein Denkvermögen zu verlassen, um es zu etwas zu bringen, spricht mich nicht an.                                                                          | 0.573        | 5.34          | 1.52     | 0.54         |         |         |         |
| 5   | Ich finde es besonders befriedigend, eine bedeutende Aufgabe abzuschließen, die viel Denken und geistige Anstrengung erfordert hat.                                                  | 0.440        | 5.69          | 1.35     | 0.41         |         | x       |         |
| 6   | Ich denke lieber über kleine, alltägliche Vorhaben nach, als über langfristige. <sup>a</sup>                                                                                         | 0.326        | 4.31          | 1.56     | 0.30         |         |         |         |
| 7   | Ich würde lieber etwas tun, das wenig Denken erfordert, als etwas, das mit Sicherheit meine Denkfähigkeit herausfordert. <sup>a</sup>                                                | 0.707        | 5.26          | 1.39     | 0.66         | x       | x       | x       |

|    |                                                                                                                                                                |       |      |      |      |   |   |   |
|----|----------------------------------------------------------------------------------------------------------------------------------------------------------------|-------|------|------|------|---|---|---|
| 8  | Ich finde wenig Befriedigung darin, angestrengt und stundenlang nachzudenken. <sup>a</sup>                                                                     | 0.682 | 4.61 | 1.71 | 0.63 | x | x | x |
| 9  | In erster Linie denke ich, weil ich muss. <sup>a</sup>                                                                                                         | 0.558 | 5.81 | 1.49 | 0.52 |   | x |   |
| 10 | Ich trage nicht gern die Verantwortung für eine Situation, die viel Denken erfordert. <sup>a</sup>                                                             | 0.466 | 5.10 | 1.59 | 0.43 |   |   |   |
| 11 | Denken entspricht nicht dem, was ich unter Spaß verstehe. <sup>a</sup>                                                                                         | 0.544 | 5.16 | 1.66 | 0.50 |   |   | x |
| 12 | Ich versuche, Situationen vorauszuahnen und zu vermeiden, in denen die Wahrscheinlichkeit groß ist, dass ich intensiv über etwas nachdenken muss. <sup>a</sup> | 0.509 | 5.49 | 1.48 | 0.48 |   |   |   |
| 13 | Ich habe es gern, wenn mein Leben voller kniffliger Aufgaben ist, die ich lösen muss.                                                                          | 0.569 | 4.10 | 1.54 | 0.53 | x |   | x |
| 14 | Ich würde komplizierte Probleme einfachen Problemen vorziehen.                                                                                                 | 0.515 | 3.69 | 1.55 | 0.48 |   |   |   |
| 15 | Es genügt mir, einfach die Antwort zu kennen, ohne die Gründe für die Antwort eines Problems zu verstehen. <sup>a</sup>                                        | 0.486 | 5.66 | 1.45 | 0.46 |   |   |   |
| 16 | Es genügt, dass etwas funktioniert, mir ist es egal, wie oder warum. <sup>a</sup>                                                                              | 0.489 | 5.31 | 1.58 | 0.46 |   |   |   |

---

*Anmerkungen:* NFC-K-1 = Need for Cognition-Kurzskala-1; NFC-K-2 = Need for Cognition-Kurzskala-2; NFC-K-3 = Need for Cognition-Kurzskala-3. <sup>a</sup> Item ist invertiert.

Anhang 2. Kennwerte aller verwendeten Skalen.

| Skala                                             | Item-<br>zahl | Studie 1<br>Selektion |     |           | Studie 2<br>Validierung |          |     |           |
|---------------------------------------------------|---------------|-----------------------|-----|-----------|-------------------------|----------|-----|-----------|
|                                                   |               | $\alpha$              | $N$ | $r$ (NFC) | Item-<br>zahl           | $\alpha$ | $N$ | $r$ (NFC) |
| NFC Langskala                                     | 16            | .87                   | 282 | 1         | 16                      | .89      | 528 | 1         |
| NFC Kurzsкала 1                                   | 5             | .76                   | 282 | .91**     | 5                       | .71      | 184 | .80**     |
| NFC Kurzsкала 2                                   | 5             | .72                   | 282 | .91**     | 5                       | .69      | 171 | .81**     |
| NFC Kurzsкала 3                                   | 5             | .75                   | 282 | .91**     | 5                       | .72      | 175 | .81**     |
| Offenheit, NEO-FFI                                | 12            | .64                   | 282 | .40**     | 12                      | .71      | 529 | .39**     |
| Präferenz für Deliberation (PID)                  | 9             | .86                   | 282 | .29**     | 9                       | .84      | 530 | .31**     |
| Typisches Intellektuelles Engagement (TIE)        | 18            | .62                   | 282 | .58**     | 18                      | .82      | 529 | .62**     |
| Soziale Erwünschtheit                             | 20            | .68                   | 282 | .21**     | 20                      | .70      | 515 | .26**     |
| Lernzielorientierung (LZ), SELLMO                 | 8             | .82                   | 267 | .41**     | 8                       | .84      | 516 | .49**     |
| <i>LZ Beruf</i>                                   | 8             | .83                   | 122 | .37**     | 8                       | .83      | 325 | .51**     |
| <i>LZ Student</i>                                 | 8             | .75                   | 100 | .34**     | 8                       | .85      | 168 | .43**     |
| <i>LZ Schüler</i>                                 | 8             | .87                   | 45  | .60**     | 8                       | .88      | 23  | .60**     |
| Vermeidungsleistungszielorientierung (VZ), SELLMO | --            | --                    | --  | --        | 8                       | .92      | 516 | -.29**    |
| <i>VZ Beruf</i>                                   | --            | --                    | --  | --        | 8                       | .91      | 325 | -.24**    |
| <i>VZ Student</i>                                 | --            | --                    | --  | --        | 8                       | .94      | 168 | -.42**    |
| <i>VZ Schüler</i>                                 | --            | --                    | --  | --        | 8                       | .85      | 23  | .17       |
| Gewissenhaftigkeit, NEO-FFI                       | --            | --                    | --  | --        | 12                      | .84      | 530 | .29**     |

Anmerkungen: NFC = Need for Cognition; NEO-FFI = NEO-Fünf-Faktoren-Inventar nach Costa und Mc Crae; SELLMO = Skalen zur Erfassung der Lern- und Leistungsmotivation; \* $p < .05$ , \*\* $p < .01$ .

Anhang 3. Faktorladungen und Residualvarianzen der CFA<sub>kor</sub> der selektierten Kurzskalen in der Selektionsstudie.

|                        | NFC-K-2  |      |          | NFC-K-3  |      |          |
|------------------------|----------|------|----------|----------|------|----------|
|                        | Schätzer | S.E. | <i>p</i> | Schätzer | S.E. | <i>p</i> |
| <b>Faktorladungen</b>  |          |      |          |          |      |          |
| Item 1                 | 1.04     | 0.14 | < .001   | 0.97     | 0.11 | -        |
| Item 2                 | 0.52     | 0.10 | < .001   | 0.88     | 0.11 | < .001   |
| Item 3                 | 0.85     | 0.13 | < .001   | 1.11     | 0.14 | < .001   |
| Item 4                 | 1.01     | 0.15 | < .001   | 0.72     | 0.13 | < .001   |
| Item 5                 | 0.69     | 0.13 | < .001   | 0.81     | 0.11 | < .001   |
| <b>Fehlervarianzen</b> |          |      |          |          |      |          |
| Item 1                 | 1.17     | 0.25 | < .001   | 1.31     | 0.19 | < .001   |
| Item 2                 | 1.54     | 0.14 | < .001   | 1.16     | 0.17 | < .001   |
| Item 3                 | 1.22     | 0.20 | < .001   | 1.70     | 0.26 | < .001   |
| Item 4                 | 1.91     | 0.29 | < .001   | 2.23     | 0.23 | < .001   |
| Item 5                 | 1.75     | 0.20 | < .001   | 1.71     | 0.18 | < .001   |

*Anmerkungen:* NFC-K-2 = Need for Cognition-Kurzskala-2; NFC-K-3 = Need for Cognition-Kurzskala-3. S.E. = Standardfehler. Die Varianz des Faktors NFC wurde auf 1 fixiert.

Anhang 4. Faktorladungen und Residualvarianzen der CFA<sub>kor</sub> der getesteten Kurzskalen in der Validierungsstudie.

|                        | NFC-K-1  |      |          | NFC-K-2  |      |          | NFC-K-3  |      |          |
|------------------------|----------|------|----------|----------|------|----------|----------|------|----------|
|                        | Schätzer | S.E. | <i>p</i> | Schätzer | S.E. | <i>p</i> | Schätzer | S.E. | <i>p</i> |
| <b>Faktorladungen</b>  |          |      |          |          |      |          |          |      |          |
| Item 1                 | 0.79     | 0.12 | < .001   | 0.75     | 0.15 | < .001   | 1.31     | 0.16 | < .001   |
| Item 2                 | 0.73     | 0.11 | < .001   | 1.01     | 0.15 | < .001   | 0.62     | 0.12 | < .001   |
| Item 3                 | 0.44     | 0.13 | < .001   | 0.61     | 0.14 | < .001   | 0.70     | 0.16 | < .001   |
| Item 4                 | 1.47     | 0.14 | < .001   | 0.96     | 0.18 | < .001   | 0.51     | 0.14 | < .001   |
| Item 5                 | 1.03     | 0.12 | < .001   | 0.51     | 0.15 | .001     | 1.24     | 0.16 | < .001   |
| <b>Fehlervarianzen</b> |          |      |          |          |      |          |          |      |          |
| Item 1                 | 1.76     | 0.21 | < .001   | 2.03     | 0.26 | < .001   | 1.42     | 0.30 | < .001   |
| Item 2                 | 1.52     | 0.18 | < .001   | 0.72     | 0.27 | .008     | 1.66     | 0.20 | < .001   |
| Item 3                 | 2.19     | 0.24 | < .001   | 1.59     | 0.21 | < .001   | 2.56     | 0.30 | < .001   |
| Item 4                 | 0.92     | 0.27 | .001     | 2.12     | 0.34 | < .001   | 2.31     | 0.26 | < .001   |
| Item 5                 | 1.26     | 0.19 | < .001   | 2.28     | 0.26 | < .001   | 1.18     | 0.33 | < .001   |

*Anmerkungen:* NFC-K-1 = Need for Cognition-Kurzskala-1; NFC-K-2 = Need for Cognition-Kurzskala-2; NFC-K-3 = Need for Cognition-Kurzskala-3. S.E. = Standardfehler. Die Varianz des Faktors NFC wurde auf 1 fixiert.

Anhang 5. Ergebnisse der Messinvarianz-Analysen auf den Subskalen und der Langform der Selektionsstudie.

|         |                        | Bildung                    |                          |                                         |                                     | Geschlecht               |                                         |                                     |  |
|---------|------------------------|----------------------------|--------------------------|-----------------------------------------|-------------------------------------|--------------------------|-----------------------------------------|-------------------------------------|--|
|         |                        | Basismodell<br>ungruppiert | Konfigurale<br>Invarianz | Metrische Invarianz<br>(vs. konfigural) | Skalare Invarianz (vs.<br>metrisch) | Konfigurale<br>Invarianz | Metrische Invarianz<br>(vs. konfigural) | Skalare Invarianz (vs.<br>metrisch) |  |
| NFC-K-2 | $\chi^2 (df), p$       | 0.42 (2), .812             | 11.50 (6), .074          | 22.54 (14), .068                        | 32.97 (22), .062                    | 2.20 (4), .699           | 7.44 (8), .490                          | 7.95 (12), .789                     |  |
|         | $\Delta\chi^2 (df), p$ | -                          | -                        | 11.05 (8), <b>.199</b>                  | 10.42 (8), <b>.237</b>              | -                        | 5.24 (4), <b>.263</b>                   | 0.50 (4), <b>.973</b>               |  |
|         | RMSEA                  | 0.000                      | 0.099                    | 0.081                                   | 0.073                               | 0.000                    | 0.000                                   | 0.000                               |  |
|         | $\Delta$ RMSEA         | -                          | -                        | <b>-0.018</b>                           | <b>-0.008</b>                       | -                        | <b>0.000</b>                            | <b>0.000</b>                        |  |
|         | CFI                    | 1.000                      | 0.979                    | 0.968                                   | 0.959                               | 1.000                    | 1.000                                   | 1.000                               |  |
|         | $\Delta$ CFI           | -                          | -                        | 0.011                                   | <b>0.009</b>                        | -                        | <b>0.000</b>                            | <b>0.000</b>                        |  |
| NFC-K-3 | $\chi^2 (df), p$       | 0.48 (2), .786             | 8.20 (6), .224           | 13.55 (14), .484                        | 21.52 (22), .489                    | 2.71 (4), .608           | 9.23 (8), .324                          | 13.62 (12), .326                    |  |
|         | $\Delta\chi^2 (df), p$ | -                          | -                        | 5.35 (8), <b>.720</b>                   | 7.97 (8), <b>.437</b>               | -                        | 6.52 (4), <b>.164</b>                   | 4.39 (4), <b>.355</b>               |  |
|         | RMSEA                  | 0.000                      | 0.063                    | 0                                       | 0                                   | 0.000                    | 0.033                                   | 0.031                               |  |
|         | $\Delta$ RMSEA         | -                          | -                        | <b>-0.063</b>                           | <b>0.000</b>                        | -                        | 0.033                                   | <b>-0.002</b>                       |  |
|         | CFI                    | 1.000                      | 0.992                    | 1                                       | 1                                   | 1.000                    | 0.996                                   | 0.995                               |  |
|         | $\Delta$ CFI           | -                          | -                        | <b>-0.008</b>                           | <b>0</b>                            | -                        | <b>0.004</b>                            | <b>0.001</b>                        |  |
| NFC     | $\chi^2 (df), p$       | 142.54 (59), < .001        | 307.83 (177), < .001     | 360.96 (207), < .001                    | 397.75 (237), < .001                | 228.19 (118), < .001     | 260.09 (133), < .001                    | 278.52 (148), < .001                |  |
|         | $\Delta\chi^2 (df), p$ | -                          | -                        | 53.14 (30), .006                        | 36.79 (30), <b>.183</b>             | -                        | 31.9 (15), .007                         | 18.44 (15), <b>.240</b>             |  |
|         | RMSEA                  | 0.071                      | 0.089                    | 0.089                                   | 0.085                               | 0.081                    | 0.082                                   | 0.079                               |  |
|         | $\Delta$ RMSEA         | -                          | -                        | <b>0.000</b>                            | <b>-0.004</b>                       | -                        | <b>0.007</b>                            | <b>0.002</b>                        |  |
|         | CFI                    | 0.939                      | 0.910                    | 0.894                                   | 0.890                               | 0.923                    | 0.912                                   | 0.909                               |  |
|         | $\Delta$ CFI           | -                          | -                        | 0.016                                   | <b>-0.004</b>                       | -                        | 0.011                                   | 0.014                               |  |

Anmerkungen: NFC = Need for Cognition; NFC-K-2 = Need for Cognition-Kurzskala-2; NFC-K-3 = Need for Cognition-Kurzskala-3. Ergebnisse, die für eine Messinvarianz sprechen sind fett markiert.
