# Supplementary material for: Ein Vergleich traditioneller und computergestützter Methoden zur Erstellung einer deutschsprachigen Need for Cognition Kurzskala
Source: Atypon-hosted journal article supplement (doi:10.1026/0012-1924/a000242), 2019-12-19
Supplement: 0012-1924_a000242_esm2.pdf [file 0012-1924_a000242_esm2.pdf]

# Code Supplement

zum Artikel **Ein Vergleich traditioneller und computergestützter Methoden zur Erstellung einer deutschsprachigen Need for Cognition Kurzsкала** (Beißert, Köhler, Rempel und Krüyen)

Die im Artikel beschriebenen Analysen und Ergebnisse können mit Hilfe eines umfassenden Code Supplements nachvollzogen und erweitert werden. Dieses auf Github frei verfügbare Code Repository **nfc-k** beinhaltet alle notwendigen Rohdaten sowie R-, SPSS- und Mplus-Skripte.

**[Link zum Code Supplement auf Github](#)**

## Struktur

Das Code Supplement orientiert sich entlang des Artikels und teilt sich in die Selektionsstudie ("Studie 1: Kurzsкаlenentwicklung") und die Validierungsstudie ("Studie 2: Kurzsкаlenvalidierung"). Die jeweiligen Unterordner enthalten die Rohdaten (O\_Daten) sowie verschiedene Unterordner und Skripte zur Durchführung der Analysen.

## Nutzung

Die beiden R-Skripte

- Teil1\_Selektionsstudie / Berechnungen\_Selektionsstudie.R
- Teil2\_Validierungsstudie / Berechnungen\_Validierungsstudie.R

stellen die Dokumentation der jeweiligen Analysen dar und verweisen auf alle notwendigen weiteren Skripte. Durch Ausführen dieser beiden Skripte können alle Analysen reproduziert werden.

## Lokale Anpassungen

Beim Start der jeweiligen Skripte müssen die mit "#!#" markierten Pfade manuell angepasst werden.
